# Negative T cell selection on non-random peptides promotes robust self-nonsel self discrimination

Inge M. N. Wortel<sup>a,\*</sup>, Can Keşmir<sup>b</sup>, Rob J. de Boer<sup>b</sup>, Judith N. Mandl<sup>c</sup>, and Johannes Textor<sup>a,b</sup>

<sup>a</sup>Department of Tumor Immunology, Radboud Institute for Molecular Life Sciences, Geert Grooteplein 26-28, 6525 GA, Nijmegen, The Netherlands; <sup>b</sup>Theoretical Biology, Department of Biology, Utrecht University, Padualaan 8, 3584 CH, Utrecht, The Netherlands; <sup>c</sup>Department of Physiology, McGill University, 3649 Promenade Sir William Osler, Quebec H3G 0B1, Montreal, Canada; \*Corresponding author, email: Inge.Wortel@radboudumc.nl

April 5, 2019

1 Our adaptive immune system has the remarkable ability to distinguish previously unseen foreign peptides from harmless self.  
2 This self-foreign discrimination was long thought to arise from the silencing of self-reactive T cells during negative selection in  
3 the thymus, but recent data show that negative selection is far from complete. Here we ask how a repertoire containing many  
4 self-reactive T cells can nevertheless discriminate self from foreign. We address this question using realistic-scale computational  
5 models of the T cell repertoire. Our models show that moderate T cell cross-reactivity automatically skews the post-selection  
6 repertoire towards peptides that differ systematically from self. But even when no systematic differences between self and  
7 foreign exist, discrimination remains possible if the peptides presented in the thymus are chosen in a way that minimizes the  
8 co-occurrence of similar, redundant self peptides. Thus, our model predicts that negative selection on a well-chosen subset of self  
9 peptides biases the resulting repertoire towards better detection of both self-similar and -dissimilar pathogens. This effect would  
10 allow the immune system to “learn self by example”, an ability shared with cognitive systems.

**Keywords:** Negative selection • Central tolerance • Self-nonsel self discrimination • T cell repertoires • Artificial immune system • Learning by example

1 To eliminate pathogens without damaging healthy cells, the  
2 immune system must discriminate between self and foreign  
3 (nonsel self). The innate arm of the immune system is able to do  
4 so with a limited number of germline-encoded receptors that  
5 recognize pathogen-associated molecular patterns. By contrast,  
6 the adaptive arm of the immune system, which is found in all  
7 jawed vertebrates and is mediated by T and B lymphocytes,  
8 uses a vastly diverse repertoire of receptors to generate specific  
9 protective responses against any pathogen it encounters (1, 2).  
10 For example, humans have a repertoire of at least  $10^7$  different T  
11 cells (3), each expressing one or two of the  $>10^{15}$  unique receptor  
12 sequences that can arise from the stochastic recombination of  
13 V(D)J gene segments and addition of non-templated nucleotides  
14 (4, 5). These T cell receptors (TCRs) recognize short foreign  
15 peptides presented on major histocompatibility complex (MHC)  
16 molecules on the surface of infected or cancerous cells.

17 However, the random TCR generation process inevitably  
18 also produces TCRs that recognize self peptides presented by  
19 healthy cells. It was long thought that the majority of these  
20 self-reactive receptors are effectively eliminated during T cell  
21 development in the thymus through a process termed negative  
22 selection (6), but recent studies have shown that this process  
23 is nowhere near as complete as it was thought to be (7–9). In  
24 fact, given that T cells may only encounter an estimated  $10^3$ - $10^5$   
25 different peptides during negative selection – a small fraction  
26 of all MHC-binding self peptides – it is not trivial how negative  
27 selection can achieve self-foreign discrimination at all (10–12).

28 Here, we use computational models to investigate under  
29 which conditions negative selection can promote self-foreign  
30 discrimination, given that T cells are only exposed to a subset of  
31 self peptides. We show that to a certain extent, T cell repertoires  
32 can robustly learn “self” from an incomplete set of examples if  
33 (1) T cells are moderately cross-reactive, and (2) the subset of  
34 self peptides presented in the thymus is not random but chosen

in a way that reduces redundancy. 35

## Results 36

**An artificial immune system discriminates self from foreign after negative selection.** To investigate how incomplete  
37 negative selection can still foster effective self-foreign discrim-  
38 ination, we devised an “artificial immune system” (AIS) (13).  
39 Our AIS is an algorithmic model of a T cell repertoire (14), simi-  
40 lar to how an artificial neural network (ANN) is an algorithmic  
41 model of the central nervous system. Because it was important  
42 to consider T cell repertoires of realistic scale and complexity,  
43 we exploited data compression techniques that allow building  
44 AISs containing billions of TCRs (15). 45

46 Like ANNs, AISs are not only used for *in silico* modelling of  
47 the biological system, but also as general-purpose classification  
48 algorithms. We took advantage of this property by first using a  
49 well-interpretable classification problem outside of immunology  
50 to investigate how a TCR repertoire could discriminate a foreign  
51 peptide from a self peptide it has not encountered during  
52 selection. Specifically, we built an AIS that distinguishes English  
53 from other languages based on short strings (letter sequences)  
54 of text. This artificial problem mimics the task of self-foreign  
55 discrimination because in both cases, classes (languages or  
56 proteomes) are to be distinguished based on a limited amount  
57 of information (short strings or peptides). A useful property of  
58 the language problem is that it can take on a range of difficulties,  
59 as very dissimilar languages such as English and the South-  
60 African language Xhosa are much easier to distinguish than  
61 related languages such as modern and medieval English. 62

63 Our model belongs to the family of “string-based” AISs  
64 (10, 14–16) that represents each TCR as a binding motif, and  
65 defines a TCR’s affinity for a string as the maximum number of  
66 adjacent positions where this motif matches the string (Fig. 1A)  
67 (Methods in SI Appendix). A TCR is defined to *react* to all

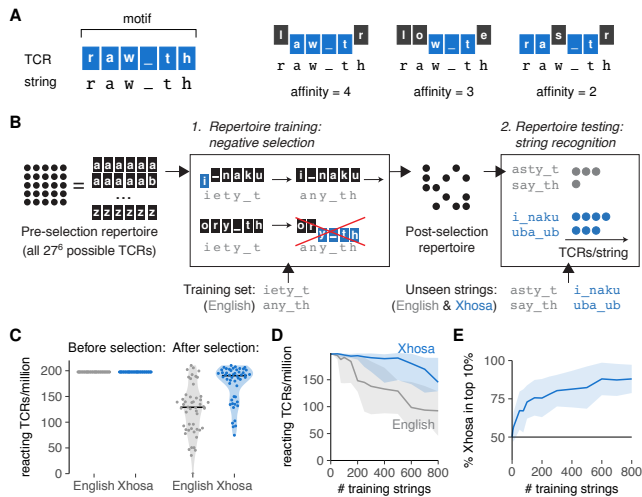

**Fig. 1. Negative selection on a subset of the whole "self" can achieve self-foreign discrimination.** (a) Our model of string recognition represents TCRs by a *binding motif* – the string they bind to most strongly (left). Their affinity for any given string equals the maximum number of adjacent positions where the binding motif matches the string (right). (b) Simulating negative selection *in silico*: (1) TCRs in the unbiased pre-selection repertoire (with all possible  $27^6 \approx 400$  million TCR motifs of 6 characters [a-z and \_]) are deleted if their affinity for any of the *training strings* exceeds the functional response threshold  $t$ . (2) Unseen English and Xhosa strings are exposed to the post-selection repertoire to find the number of remaining TCRs reacting to them (that is, TCRs with affinity  $\geq t$ ). (c) Reacting TCRs per million of unseen English and Xhosa strings, before and after negative selection on 500 English strings. Horizontal lines indicate medians. (d) Median and interquartile range of English- and Xhosa-reactivity after negative selection on English strings. (e) Percentage of Xhosa strings among the 10% of strings with the most reacting TCRs after negative selection on English strings (mean  $\pm$  standard deviation, SD, of 30 simulations). No discrimination should result in equal amounts (50%) of English and Xhosa strings in this top 10%. Throughout this figure, we tested 50 English and 50 Xhosa strings using an affinity threshold  $t = 3$  for negative selection.

68 strings for which it has an affinity of at least some threshold  $t$ ,  
 69 which represents a functional response threshold rather than  
 70 a mere binding threshold. Crucially, reaction does not require  
 71 a perfect match between the string and TCR motif. Thus, our  
 72 TCRs are *cross-reactive* and react to multiple, related peptides.  
 73 In contrast to models based on binding energy (17, 18), the  
 74 "motif-based" recognition implemented in our model (Fig. 1A)  
 75 ensures that both peptides recognized by the same TCR and  
 76 TCRs recognizing the same peptide share sequence motifs – in  
 77 line with observations from TCR-specific peptide sets (19–21)  
 78 and peptide-specific TCR repertoires (22, 23).

79 To test how well TCR repertoires could discriminate be-  
 80 tween two very dissimilar languages (English and Xhosa) after  
 81 incomplete negative selection, we started with an unbiased  
 82 pre-selection repertoire with equal numbers of TCRs reacting  
 83 to English and Xhosa, and then performed *in silico* negative  
 84 selection on an English *training set* by deleting all TCRs reacting  
 85 to any of the (<1000) training strings (Fig. 1B, using a threshold  
 86  $t = 3$  leading to intermediate cross-reactivity). Although this  
 87 negative selection did not completely abrogate TCR reactivity  
 88 towards English strings outside of the training set, it still biased  
 89 the post-selection repertoire to contain more TCRs reacting to  
 90 Xhosa than to English (Fig. 1C,D).

91 Given that peptides to which many TCRs react tend to elicit  
 92 stronger immune responses (24), it is important that these  
 93 most frequently recognized peptides are predominantly foreign.

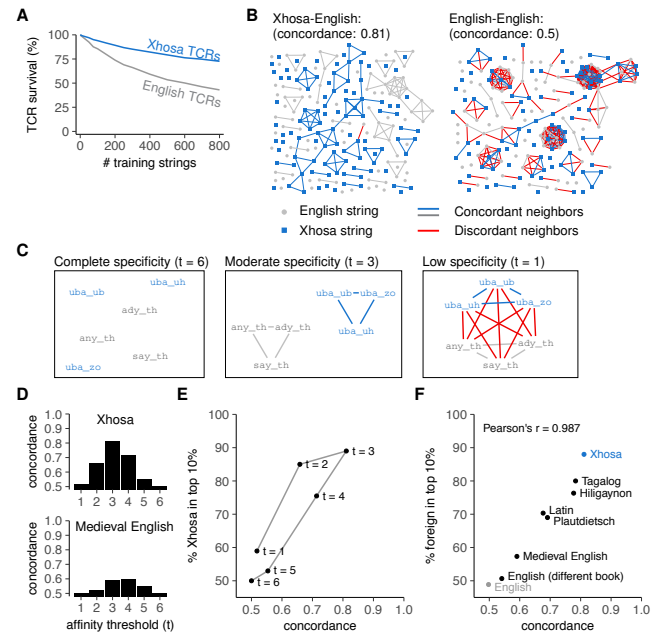

**Fig. 2. Discrimination requires moderate TCR cross-reactivity and dissimilar self- and foreign strings.** (a) Mean percentage of surviving TCRs reacting to English and Xhosa strings after negative selection (using threshold  $t = 3$ ). Plot represents a different analysis of data shown in Fig. 1D,E. (b) String similarity visualized in a graph where nodes (strings) are neighbors (connected by edges) if at least 5/million pre-selection TCRs react to both. (c) Cross-reactivity increases the number of edges between example English and Xhosa strings (demonstrated here for a few examples). Edges between strings from different languages are shown in red. (d) Concordance in the English-Xhosa and English-Medieval English graphs for different thresholds  $t$ . (e) Concordance and discrimination between English and Xhosa for different thresholds  $t$ . Negative selection was performed on 800 English strings. Datapoint for  $t = 3$  corresponds to the endpoint of Fig. 1E. (f) Language concordance versus enrichment of foreign strings among the top 10% most frequently recognized strings after negative selection ( $t = 3$ , selection on 800 English strings). Pearson's correlation coefficient  $r = 0.977$ , with 95% confidence interval [0.890, 0.995]. The control "English" compares two sets of English strings from the same book that was used for training (Moby Dick), whereas "English (different book)" compares unseen English strings from the training book to those from the Bible. The point "Xhosa" corresponds to the point " $t = 3$ " in Fig. 2E. See also Fig. S1.

The 10% most frequently recognized strings in our simulation  
 were indeed predominantly Xhosa strings (Fig. 1E). The affinity  
 distribution of these TCR interactions was shifted towards  
 higher affinities for Xhosa, but only very slightly (Fig. S1A). For  
 sake of simplicity, we therefore focus only on the number of  
 reacting TCRs throughout this paper, rather than considering  
 different affinities separately. This choice to consider TCRs with  
 a broad range of affinities is supported by growing evidence  
 that also lower affinity TCRs are important contributors to  
 immune responses (25).

**Discrimination success relies on moderate cross-reactivity and sequence dissimilarity.** These results confirm that our AIS can easily distinguish English from Xhosa even after incomplete negative selection. To investigate in more detail under which conditions this discrimination arises, we analyzed which TCRs were deleted during negative selection on English strings (Fig. 2). TCRs reacting to "unseen" English strings (those absent from the training set TCRs were exposed to during negative selection) had a reduced survival compared to TCRs reacting to Xhosa strings (Fig. 2A). Because TCRs are only deleted when

114 they react to at least one string in the training set, this implies  
 115 that strings eliciting reactions from the same TCRs tend to  
 116 represent the same language. To visualize this, we created  
 117 graphs in which each node represents a string, and two nodes  
 118 become connected neighbors when at least 5 TCRs per million  
 119 pre-selection TCRs react to both of them (Fig. 2B). Indeed, neighbor  
 120 strings are largely from the same language (Fig. 2B, left),  
 121 which is quantified by the *concordance*, the average proportion  
 122 of neighbors from the same language. To show that the high  
 123 concordance (0.81) of English and Xhosa strings represents  
 124 intrinsic differences between English and Xhosa strings, we  
 125 randomly divided English strings into two groups and constructed  
 126 a similar graph, which as expected has a concordance  
 127 of only 0.5 (Fig. 2B, right). This confirms that our TCRs can only  
 128 discriminate between two sets of strings that are intrinsically  
 129 different.

130 Our results indicate two key requirements for achieving self-  
 131 foreign discrimination through negative selection on an incomplete  
 132 subset of self: an appropriate level of TCR *cross-reactivity*  
 133 towards multiple, related strings, and sufficient *dissimilarity*  
 134 between self- and foreign.

135 To illustrate the importance of cross-reactivity, we set the  
 136 affinity threshold in our model to  $t = 6$ , so that each TCR was  
 137 maximally specific and only reacted to the one string matching  
 138 its binding motif perfectly (i.e., no cross-reactivity). The  
 139 corresponding graph contains no neighbors at all (Fig. 2C, left)  
 140 and has a concordance of 0.5 (Fig. 2D,E). Consequently, maximal  
 141 TCR specificity abolishes self-foreign discrimination in our  
 142 model (Fig. 2E) because without cross-reactivity, negative  
 143 selection cannot delete TCRs for strings that are not part of  
 144 the training set – it therefore deletes very few TCRs (Fig. S1B).  
 145 However, very low specificity ( $t = 1$ ) is equally problematic as  
 146 it results in a graph where any two strings are neighbors  
 147 irrespective of language (Fig. 2C, right), which leads to low  
 148 concordance even between dissimilar languages (Fig. 2D,E), poor  
 149 self-foreign discrimination (Fig. 2E), and often even deletion of  
 150 the entire repertoire (Fig. S1B). Only intermediate specificities  
 151 allow TCRs to preferentially react to either English or Xhosa  
 152 strings (Fig. 2C, middle). This results in both a high  
 153 concordance (Fig. 2D,E) and a preference for Xhosa-reactivity  
 154 in the post-selection repertoire (Fig. 2E).

155 As shown in Fig. 2B, even an optimal level of cross-reactivity  
 156 will not result in a high concordance unless the languages are  
 157 intrinsically different. The accomplished level of self-foreign  
 158 discrimination therefore depends directly on the similarity  
 159 between self- and foreign sequences. Indeed, when we repeated  
 160 our analysis for a number of other languages with varying  
 161 similarity to English, we found a linear correlation between  
 162 concordance and the acquired level of discrimination (Fig. 2F).  
 163 This was a property of the tested languages rather than the  
 164 specific texts chosen, as our model could not discriminate  
 165 between English strings from different books (Fig. 2F).

166 **Sequence similarity hampers discrimination between self-  
 167 and foreign peptides.** These results on natural languages suggest  
 168 that TCR cross-reactivity and sequence dissimilarity should  
 169 also be important for self-foreign discrimination in the immune  
 170 system. We therefore applied our AIS model to self-foreign  
 171 discrimination by CD8<sup>+</sup> T cells, which recognize peptides bound  
 172 to the MHC class I (MHC-I) complex with a typical length of  
 173 nine amino acids (AAs). The six residues at positions 3-8 are  
 174 thought to be most relevant for TCR binding (26). Accordingly,

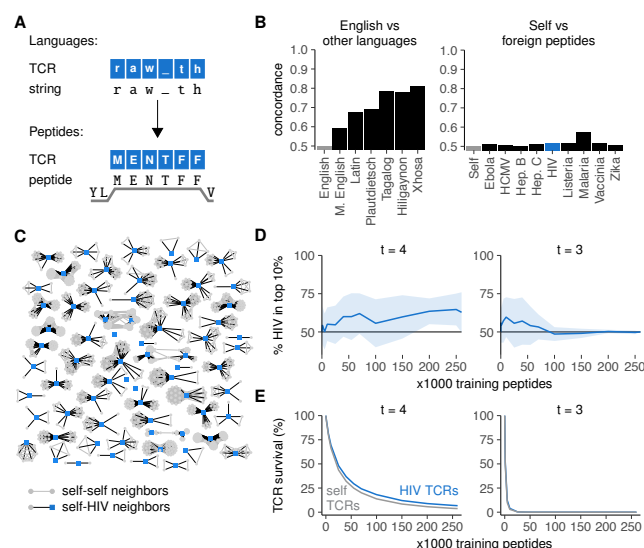

175 **Fig. 3. High similarity between self- and foreign peptides hampers their**  
 176 **discrimination by the immune system.** (a) TCR binding to peptides on MHC-I  
 177 (HLA-A2:01) focuses on the 6 residues at positions 3-8 and resembles the TCR-  
 178 string model as in Fig. 1A. (b) Concordance for English versus other languages  
 179 (left) compared to that for self versus foreign peptides (right). Language  
 180 concordances from Fig. 2F are included for comparison. (c) Graph of HIV peptides  
 181 and their neighbors. Edges connect peptides that have at least 5/million  
 182 pre-selection TCRs in common. (d) Percentage of HIV-peptides among the 10%  
 183 most frequently recognized peptides after negative selection (mean±SD of 30  
 184 simulations). (e) Mean percentage surviving TCRs for self and HIV peptides after  
 185 negative selection.

175 we modified our TCR model to accommodate 6-mer peptide  
 176 sequences rather than six-letter strings (Fig. 3A). Setting the  
 177 affinity threshold to an intermediate value of  $t = 4$  in this model  
 178 allowed each TCR to react to roughly one in every 55,000 pep-  
 179 tides (Fig. S2A) – a cross-reactivity level that reasonably matches  
 180 an experimental estimate of one in 30,000 (27). Furthermore, at  
 181 this level of cross-reactivity, peptides elicited reactions from 0  
 182 to 20 TCRs per million in our simulated repertoires (Fig. S2B),  
 183 in line with experimental data (28–31). These results suggest  
 184 that the cross-reactivity level of TCRs roughly matches that of  
 185 our model at  $t = 4$ , well within the “moderate” range allowing  
 186 discrimination between dissimilar strings (Fig. 2D,E).

187 To examine whether self- and foreign peptides are dissimilar  
 188 enough to allow self-foreign discrimination, we first predicted  
 189 MHC-I-binding peptides from the human proteome (32) and  
 190 used the residues 3-8 as MHC-bound self peptides in our model.  
 191 To obtain foreign sequences, we predicted MHC binders for  
 192 a variety of pathogens associated with T cell immunity: the  
 193 malaria parasite, the bacterium *Listeria monocytogenes*, and the  
 194 viruses ebola, hepatitis B, hepatitis C, human cytomegalovirus  
 195 (HCMV), human immunodeficiency virus (HIV), and vaccinia  
 196 (Table S1).

197 Graphs of self versus foreign peptides had strikingly low  
 198 concordances (Fig. 3B)(Methods in SI Appendix), barely exceed-  
 199 ing the control concordance observed between two random,  
 200 different sets of self peptides (“Self”, negative control), and  
 201 lower than the concordance we had observed between modern  
 202 and medieval English. This was a property of the sequences  
 203 themselves rather than the chosen threshold  $t$  (Fig. S3A). In  
 204 a graph of all HIV peptides and their neighbors, the majority  
 205 of HIV peptides had many self neighbors whereas none of

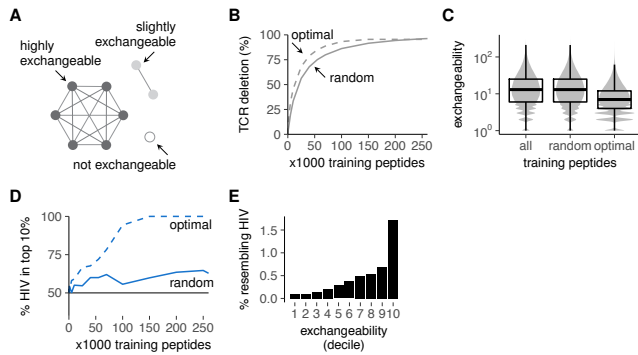

**Fig. 4. Improved self representation during negative selection allows self-foreign discrimination.** (a) Self peptides from large clusters delete the same TCRs as their neighbors and are thus exchangeable during negative selection, whereas peptides from small clusters are not. (b) Mean percentage of self-reactive TCRs deleted by optimal training sets of self peptides during negative selection. TCR deletion with random training sets was computed on the data from Fig. 3E for comparison. (c) Peptide exchangeability distribution in the full set of all self peptides compared to that in random and optimal subsets of 100,000 peptides. Exchangeability is defined as the number of self neighbors + 1. (d) Self-HIV discrimination after selection on optimal training sets. Discrimination after selection on random training sets (Fig. 3D) is shown for comparison. See also Fig. S4. (e) Percentage of self peptides with HIV neighbor(s) plotted against exchangeability (self peptides were divided into 10 equal-number deciles from low to high exchangeability). Negative selection in panels b and d was performed with  $t = 4$ , and results were plotted as mean $\pm$ SD of 30 simulations.

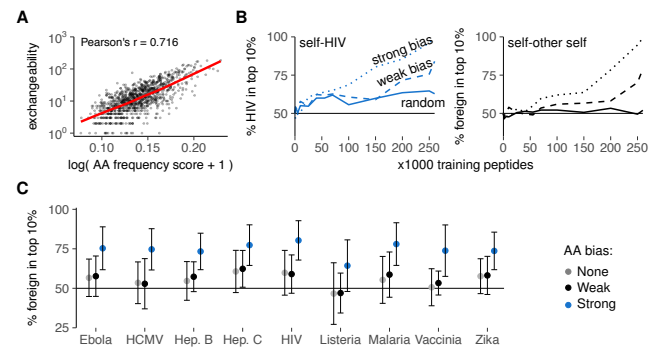

**Fig. 5. Thymic enrichment for rare AAs facilitates self-foreign discrimination by improving self representation during negative selection.** (a) Exchangeability versus peptide AA frequency score in a random sample of 1000 self peptides (frequency score is low for peptides with many rare AAs, (Methods in SI Appendix)). Pearson's correlation coefficient  $r = 0.716$ , with 95% confidence interval [0.684, 0.745]. See also Fig. S5. (b) Discrimination after negative selection on self peptides chosen with a (weak/strong) bias for rare AAs. Discrimination after selection on random peptides (Fig. 3D) is included for comparison. Plots show self-HIV discrimination (left), and self-other self discrimination (right, where a random sample of self was assigned the label "foreign" before selection on training sets from the remaining "self" peptides). (c) Self-foreign discrimination for different pathogens after negative selection on 150,000 self peptides chosen randomly or with AA bias. See Fig. S6 for the full discrimination curves. Negative selection in panels b and c was performed with  $t = 4$ , and results were plotted as mean $\pm$ SD of 30 simulations.

206 them had HIV neighbors (Fig. 3C) – indicating that most HIV  
 207 peptides are more similar to peptides from the human proteome  
 208 than to other HIV peptides.

209 This high similarity between self- and foreign peptides suggests  
 210 that achieving self-foreign discrimination via negative selection  
 211 is difficult. Indeed, although the realistic cross-reactivity  
 212 at  $t = 4$  allowed some discrimination between self- and HIV  
 213 peptides as shown by a small enrichment of HIV among most  
 214 frequently recognized peptides (Fig. 3D, left), this effect came  
 215 nowhere close to that observed for languages (Fig. 1E), even  
 216 with very large numbers of training self peptides. Consistent  
 217 with this observation, the survival of self-reactive TCRs was  
 218 only slightly lower than that of HIV-reactive TCRs (Fig. 3E, left).  
 219 These results were not specific for HIV peptides, as we obtained  
 220 similarly low levels of self-foreign discrimination for all other  
 221 pathogens tested (Fig. S3B). Self-HIV discrimination was even  
 222 worse for  $t = 3$  and rapidly disappeared completely as TCR  
 223 survival diminished for large training sets (Fig. 3D,E, right),  
 224 confirming that self-foreign discrimination becomes more difficult  
 225 when TCRs are too cross-reactive.

226 **Selection on non-random peptides greatly improves self-  
 227 foreign discrimination.** Thus, although incomplete negative  
 228 selection can achieve self-foreign discrimination in principle,  
 229 achieving sufficient discrimination is very difficult in practice  
 230 because self- and foreign peptides can be extremely similar  
 231 and therefore can be recognized by the same TCRs. Clearly,  
 232 the immune system must overcome this problem in order to  
 233 balance the removal of self-reactivity with the preservation  
 234 of foreign recognition. It has previously been suggested that  
 235 thymic selection should occur on a non-random set of self  
 236 peptides to achieve self-foreign discrimination (12). We therefore  
 237 used our model to investigate what an "optimal" set of self  
 238 peptides would look like, and how much this might improve

self-foreign discrimination.

239  
 240 As a starting point, we based the optimization of the training  
 241 set on the peptide cluster structure as observed in Fig. 3C. The  
 242 large clusters in this graph contain many similar self peptides,  
 243 which can delete the same TCRs during negative selection  
 244 (Fig. 4A). Exchanging one such peptide for one of its neighbors  
 245 during selection thus has little effect on the post-selection reper-  
 246 toire – and presenting both has little added value. By contrast,  
 247 self peptides in smaller clusters are far less exchangeable (Fig. 4A):  
 248 their TCRs cannot be removed as easily by other peptides. Thus,  
 249 negative selection on randomly chosen training sets is ineffi-  
 250 cient: these sets often contain several exchangeable peptides  
 251 that delete the same TCRs, while simultaneously missing many  
 252 non-exchangeable peptides and allowing the corresponding  
 253 self-reactive TCRs to escape. We therefore used combina-  
 254 torial optimization techniques (Methods in SI Appendix) to  
 255 compute peptide combinations that deleted as many different  
 256 self-reactive TCRs as possible ("optimal" training sets, Fig. 4B).  
 257 As expected, these optimal training sets contained fewer ex-  
 258 changeable peptides (Fig. 4C, where exchangeability equals the  
 259 number of self neighbors plus one).

260 We then tested whether these training sets optimized for  
 261 inducing tolerance could also establish self-foreign discrimination.  
 262 This is not guaranteed, as the latter requires not only the removal  
 263 of self-reactive TCRs, but also the preservation of foreign-  
 264 reactivity. Nevertheless, our optimal training sets substantially  
 265 improved self-foreign discrimination (Fig. 4D). This seems to  
 266 be a consequence of the enrichment for low exchangeability  
 267 peptides (Fig. 4C), which are less likely to delete HIV-reactive  
 268 TCRs (Fig. 4E). Importantly, this discrimination still required  
 269 appropriate TCR cross-reactivity and was absent at  $t = 3$  (Fig. S4).  
 270 From these results, we conclude that negative selection on a  
 271 representative set of self peptides can alleviate the problem  
 272 of self-foreign similarity, but only when TCRs are sufficiently

273 specific.

274 Obviously, our optimal training sets are artificial, and bio-  
275 logical negative selection cannot calculate which self peptides  
276 should be present in the thymus. We therefore investigated  
277 how a representative set of self peptides might reasonably be  
278 obtained during real negative selection. Analysis of our optimal  
279 training sets revealed an enrichment for rare AAs compared to  
280 the total set of self peptides (Fig. S5). Interestingly, peptides with  
281 many rare AAs were typically less exchangeable (Fig. 5A). This  
282 finding suggests that training sets enriched for rare AAs – simi-  
283 lar to our optimal sets – contain fewer exchangeable peptides,  
284 and might thus result in better self-foreign discrimination.

285 To test this hypothesis, we again generated training sets  
286 of different sizes, but this time picked our training peptides  
287 with a probability that depended on the AA composition of  
288 each peptide (Methods in SI Appendix). These probabilities  
289 introduced either a weak or a strong bias for self peptides with  
290 rare AAs, mimicking the AA enrichment pattern observed in  
291 our optimal training sets. This AA bias substantially improved  
292 self-foreign discrimination after negative selection, for HIV  
293 (Fig. 5B, left) and all other pathogens tested (Fig. 5C, S6).  
294 Interestingly, this strategy also worked when we first set aside  
295 a random sample of other self peptides as "foreign" before  
296 selecting training sets from the remaining "self" peptides. In  
297 this scenario, biased training sets still yielded substantial self-  
298 "foreign" discrimination, whereas random sets did not (Fig. 5B,  
299 right). This result demonstrates that negative selection on non-  
300 random training peptides facilitates self-foreign discrimination  
301 – even in the extreme case where no inherent difference between  
302 self and foreign peptides exists.

## 303 Discussion

304 Our AIS model explains how negative selection on an incom-  
305 plete set of self peptides can nonetheless bias a T cell reper-  
306 toire towards foreign recognition. We demonstrate that a  
307 non-random subset of self peptides enriched for rare AAs can  
308 balance the removal of self-reactive TCRs with the preservation  
309 of foreign-reactive receptors. Importantly, this strategy works  
310 even when self and foreign peptides are not inherently different.  
311 In fact, for the pathogens we considered, the similarity to self  
312 was so high that it is hard to conceive how any self-foreign  
313 discrimination could be achieved through negative selection on  
314 random peptides. By contrast, a "smart" peptide presentation  
315 strategy could still ensure that the peptides best recognized  
316 by the immune system are predominantly foreign – even in  
317 this difficult scenario. This notion reconciles textbook negative  
318 selection theory with recent observations that T cells see only a  
319 fraction of all self peptides during thymic selection, and that  
320 even healthy individuals have many self-reactive T cells (7).

321 Although we demonstrate here how negative selection can  
322 skew a developing repertoire away from recognition of self, our  
323 results also point out that this "central tolerance" alone is likely  
324 insufficient for reliable self-foreign discrimination. This is in  
325 line with the consensus that peripheral tolerance mechanisms  
326 are crucial to prevent and dampen immune responses by those  
327 self-reactive cells surviving negative selection. Nevertheless  
328 – under the right conditions – negative selection can at least  
329 provide a *basis* for such other mechanisms to build on. The  
330 idea of a "leaky" central tolerance strengthened by peripheral  
331 mechanisms is not new (7, 33), and is supported for example  
332 by studies showing that more nuanced discrimination becomes

possible when T cells make decisions cooperatively (34, 35).  
However, our results clearly show that it is not trivial for  
negative selection to provide even a starting point for self-  
foreign discrimination. To do so, it must somehow overcome  
the fundamental problem of similarity between self- and foreign  
peptides.

Our finding that non-random peptide presentation is a  
prerequisite for efficient self-foreign discrimination raises the  
question how the thymus might obtain a preference for pre-  
senting low-exchangeability peptides. Although it remains  
unclear exactly which and how many peptides a T cell sees  
during selection, the importance of the thymic peptidome in  
shaping the TCR repertoire is evident from the existence of spe-  
cialized antigen presenting cells, transcription factors such as  
AIRE, and even special proteasomes controlling thymic peptide  
presentation (36). We suggest that the biased presentation of  
low-exchangeability peptides required for self-foreign discrimi-  
nation might arise from special binding preferences of thymic  
antigen presentation proteins. As has already been shown for  
the thymoproteasome during thymic positive selection (37, 38),  
such binding preferences can enrich for specific subsets of self  
peptides and thereby impact the ability of a TCR repertoire  
to recognize self and foreign. While a bias for specific AAs  
such as described in this paper would be one way to enrich  
for low-exchangeability peptides, we do not exclude that other  
binding preferences could have a similar impact on self-foreign  
discrimination.

Notably, our imperfect selection accomplishes self-foreign  
discrimination by also reducing the recognition of peptides the  
T cell repertoire has not seen during selection. This capability  
of the T cell repertoire to generalize beyond given examples is  
a fundamental property of learning systems (39), and allows  
the repertoire to perform a cognitive task: learning to distin-  
guish self from foreign. Even though this learning process  
mechanistically differs from learning by the central nervous  
system, its high-level outcome is remarkably similar, and shares  
many properties with "slow learning" systems as described in  
psychology and neuroscience (40).

## Materials and Methods

**Data and code availability.** All code used in this paper will be made  
available at: [www.github.com/ingewortel/negative-selection-2018](http://www.github.com/ingewortel/negative-selection-2018). Data  
will be made available on [www.osf.io](http://www.osf.io).

**Simulation of negative selection.** Our general simulation setup can  
be outlined as follows:

1. Generation of an *unbiased* TCR repertoire containing all possible  
motifs of length 6. For details, see *Repertoire model of negative  
selection* (Methods in SI Appendix).
2. Selection of a *training set* of either  $n$  English strings or  $n$  self  
peptides. See *Sequences* for details on the sequences used, and  
*Training set selection* for details on the manners in which training  
sets are sampled (Methods in SI Appendix). The training set  
selection method was random unless mentioned otherwise in the  
figure legend. The value of  $n$  can also be found in the figure  
legend.
3. Negative selection of TCRs on the training set. All TCR motifs that  
match *any* of the training sequences in at least  $t$  adjacent positions  
are removed from the repertoire. Unless mentioned otherwise,  
negative selection was performed with an affinity threshold  $t = 3$   
for strings and  $t = 4$  for peptides (see figure legends). All TCRs  
that remain make up the *post-selection repertoire*. For details on

394 computational methods, see *Repertoire model of negative selection*  
395 (Methods in SI Appendix).

396 4. Analysis of the recognition of *test sequences* by the post-selection  
397 repertoire. Test sets always consist of "unseen" sequences that  
398 were not part of the training set used for negative selection. See  
399 figure legends for details on the number and source of the test  
400 sequences used. See *Post-selection repertoire analysis* (Methods in SI  
401 Appendix) for details on specific analysis metrics used.

402 We repeat steps 2-4 with different training and test sets for each  
403 simulation. In the case of "optimal" training sets, which are per definition  
404 selected only in one way (see *Training set selection* (Methods in SI  
405 Appendix) for details), the training set was constant across simulations  
406 but the test set was varied. Negative selection success as determined  
407 by these simulations is then assessed in the context of expectations  
408 based on the similarity between self and foreign sequences (see *Sequence*  
409 *analysis* (Methods in SI Appendix) for details).

410 **Supporting Methods.** Detailed computational methods used in this  
411 article are available as Supporting Information in the SI Appendix.

## 412 Supporting Information (SI)

413 The SI Appendix contains Supporting Methods, Figs. S1 to S6,  
414 and Table S1.

## 415 Acknowledgements

416 IW was supported by a Radboudumc PhD grant. JT was  
417 supported by a Young Investigator Grant (10620) from KWF.  
418 CK and JT were supported by an NWO-ALW grant (823.02.014),  
419 and CK was supported by the EU HORIZON2020 program  
420 (APERIM project).

## 421 References

422 1. Max D. Cooper and Matthew N. Alder. The Evolution of Adaptive Immune Systems. *Cell*,  
423 124(4):815–822, February 2006. ISSN 0092-8674. . URL <http://www.sciencedirect.com/science/article/pii/S0092867406001528>.  
424  
425 2. Martin F. Flajnik and Masanori Kasahara. Origin and evolution of the adaptive im-  
426 mune system: genetic events and selective pressures. *Nature Reviews Genetics*, 11  
427 (1):nrg2703, December 2009. ISSN 1471-0064. . URL <https://www.nature.com/articles/nrg2703>.  
428  
429 3. Q. Qi, Y. Liu, Y. Cheng, J. Glanville, D. Zhang, J.-Y. Lee, R. A. Olshen, C. M. Weyand,  
430 S. D. Boyd, and J. J. Goronzy. Diversity and clonal selection in the human t-cell repertoire.  
431 *Proceedings of the National Academy of Sciences*, 111(36):13139–13144, aug 2014. .  
432 URL <https://doi.org/10.1073/pnas.1409155111>.  
433  
434 4. Mark M. Davis and Pamela J. Bjorkman. T-cell antigen receptor genes and T-cell  
435 recognition. *Nature*, 334(6181):334395a0, August 1988. ISSN 1476-4687. . URL  
436 <https://www.nature.com/articles/334395a0>.  
437  
438 5. Veronika Zarnitsyna, Brian Evavold, Louie Schoettle, Joseph Blattman, and Rustom An-  
439 tia. Estimating the Diversity, Completeness, and Cross-Reactivity of the T Cell Repertoi-  
440 re. *Frontiers in Immunology*, 4, 2013. ISSN 1664-3224. . URL <https://www.frontiersin.org/articles/10.3389/fimmu.2013.00485/full>.  
441  
442 6. Arthur M. Silverstein. Autoimmunity versus *horror autotoxicus*: The struggle for recog-  
443 nition. *Nature Immunology*, 2(4):ni0401\_279, April 2001. ISSN 1529-2916. . URL  
444 [https://www.nature.com/articles/ni0401\\_279](https://www.nature.com/articles/ni0401_279).  
445  
446 7. Wong Yu, Ning Jiang, Peter J. R. Ebert, Brian A. Kidd, Sabina Müller, Peder J. Lund,  
447 Jeremy Juang, Keishi Adachi, Tiffany Tse, Michael E. Birnbaum, Evan W. Newell, Dar-  
448 rell M. Wilson, Gijsbert M. Grotenbreg, Salvatore Valitutti, Stephen R. Quake, and  
449 Mark M. Davis. Clonal Deletion Prunes but Does Not Eliminate Self-Specific  $\alpha\beta$ CD8+  
450 T Lymphocytes. *Immunity*, 42(5):929–941, May 2015. ISSN 1074-7613. . URL  
451 <http://www.sciencedirect.com/science/article/pii/S1074761315001818>.  
452  
453 8. F. P. Legoux, J. B. Lim, A. W. Cauley, S. Dikij, J. Ertelt, T. J. Mariani, T. Sparwasser,  
454 S. S. Way, and J. J. Moon. CD4+ T Cell Tolerance to Tissue-Restricted Self Antigens  
455 Is Mediated by Antigen-Specific Regulatory T Cells Rather Than Deletion. *Immunity*, 43  
456 (5):896–908, Nov 2015. .  
457  
458 9. Mark M. Davis. Not-So-Negative Selection. *Immunity*, 43(5):833–835, November  
459 2015. ISSN 1074-7613. . URL <http://www.sciencedirect.com/science/article/pii/S1074761315004549>.  
460  
461 10. Vincent Detours, Ramit Mehr, and Alan S. Perelson. Deriving Quantitative Constraints  
462 on T Cell Selection from Data on the Mature T Cell Repertoire. *The Journal of Im-*  
463 *munology*, 164(1):121–128, January 2000. ISSN 0022-1767, 1550-6606. . URL  
464 <http://www.jimmunol.org/content/164/1/121>.  
465  
466 11. Viktor Müller and Sebastian Bonhoeffer. Quantitative constraints on the scope of nega-  
467 tive selection. *Trends in Immunology*, 24(3):132–135, March 2003. ISSN 1471-4906. .  
468 URL <http://www.sciencedirect.com/science/article/pii/S1471490603000280>.

463 12. Nienke Vrisekoop, João P. Monteiro, Judith N. Mandl, and Ronald N. Germain. Revisiting  
464 Thymic Positive Selection and the Mature T Cell Repertoire for Antigen. *Immunity*, 41(2):  
465 181–190, August 2014. ISSN 1074-7613. . URL <http://www.sciencedirect.com/science/article/pii/S1074761314002647>.  
466  
467 13. LN de Castro and Jonathan Timmis. *Artificial Immune Systems: A New Computational*  
468 *Intelligence Approach*. Springer Science & Business Media, 2002. URL <http://www.springer.com/gp/book/9781852335946>.  
469  
470 14. Stephanie Forrest, Steven A. Hofmeyr, and Anil Somayaji. Computer Immunology. *Com-*  
471 *mun. ACM*, 40(10):88–96, October 1997. ISSN 0001-0782. . URL <http://doi.acm.org/10.1145/262793.262811>.  
472  
473 15. Michael Elberfeld and Johannes Textor. Negative selection algorithms on strings with effi-  
474 cient training and linear-time classification. *Theoretical Computer Science*, 412(6):534–  
475 542, February 2011. ISSN 0304-3975. . URL <http://www.sciencedirect.com/science/article/pii/S0304397510005013>.  
476  
477 16. J K Percus, O E Percus, and A S Perelson. Predicting the size of the T-cell receptor  
478 and antibody combining region from consideration of efficient self-nonself discrimination.  
479 *Proceedings of the National Academy of Sciences of the United States of America*, 90  
480 (5):1691–1695, March 1993. ISSN 0027-8424. . URL <https://www.ncbi.nlm.nih.gov/pmc/articles/PMC45945/>.  
481  
482 17. Andrej Košmrlj, Abhishek K. Jha, Eric S. Huseby, Mehran Kardar, and Arup K.  
483 Chakraborty. How the thymus designs antigen-specific and self-tolerant t cell receptor  
484 sequences. *Proceedings of the National Academy of Sciences*, 105(43):16671–16676,  
485 October 2008. ISSN 0027-8424, 1091-6490. . URL <http://www.pnas.org/content/105/43/16671>.  
486  
487 18. H. Chen, A. K. Chakraborty, and M. Kardar. How nonuniform contact profiles of T cell  
488 receptors modulate thymic selection outcomes. *Phys Rev E*, 97(3-1):032413, Mar 2018.  
489  
490 19. M. E. Birnbaum, J. L. Mendoza, D. K. Sethi, S. Dong, J. Glanville, J. Dobbins, E. Ozkan,  
491 M. M. Davis, K. W. Wucherpfennig, and K. C. Garcia. Deconstructing the peptide-MHC  
492 specificity of T cell recognition. *Cell*, 157(5):1073–1087, May 2014. .  
493  
494 20. R. W. Nelson, D. Beisang, N. J. Tubo, T. Dileepan, D. L. Wiesner, K. Nielsen, M. Wüthrich,  
495 B. S. Klein, D. I. Kotov, J. A. Spanier, B. T. Fee, J. J. Moon, and M. K. Jenkins. T cell  
496 receptor cross-reactivity between similar foreign and self peptides influences naive cell  
497 population size and autoimmunity. *Immunity*, 42(1):95–107, Jan 2015. .  
498  
499 21. T. P. Riley, L. M. Hellman, M. H. Gee, J. L. Mendoza, J. A. Alonso, K. C. Foley, M. I.  
500 Nishimura, C. W. Vander Kooi, K. C. Garcia, and B. M. Baker. T cell receptor cross-  
501 reactivity expanded by dramatic peptide-MHC adaptability. *Nature Chemical Biology*, 14  
502 (10):934–942, October 2018. .  
503  
504 22. P. Dash, A. J. Fiore-Gartland, T. Hertz, G. C. Wang, S. Sharma, A. Souquette, J. C.  
505 Crawford, E. B. Clemens, T. H. O. Nguyen, K. Kedzierska, N. L. La Gruta, P. Bradley,  
506 and P. G. Thomas. Quantifiable predictive features define epitope-specific T cell receptor  
507 repertoires. *Nature*, 547(7661):89–93, 07 2017. .  
508  
509 23. J. Glanville, H. Huang, A. Nau, O. Hatton, L. E. Wagar, F. Rubelt, X. Ji, A. Han, S. M.  
510 Krams, C. Pettus, N. Haas, C. S. L. Arlehamm, A. Sette, S. D. Boyd, T. J. Scriba, O. M.  
511 Martinez, and M. M. Davis. Identifying specificity groups in the T cell receptor repertoire.  
512 *Nature*, 547(7661):94–98, 07 2017. .  
513  
514 24. Marc K. Jenkins and James J. Moon. The Role of Naive T Cell Precursor Frequency  
515 and Recruitment in Dictating Immune Response Magnitude. *The Journal of Immunology*,  
516 188(9):4135–4140, May 2012. ISSN 0022-1767, 1550-6606. . URL <http://www.jimmunol.org/content/188/9/4135>.  
517  
518 25. R. J. Martinez and B. D. Evavold. Lower Affinity T Cells are Critical Components and  
519 Active Participants of the Immune Response. *Front Immunol*, 6:468, 2015. .  
520  
521 26. Sune Frankild, Rob J. de Boer, Ole Lund, Morten Nielsen, and Can Kesmir. Amino Acid  
522 Similarity Accounts for T Cell Cross-Reactivity and for "Holes" in the T Cell Repertoire.  
523 *PLOS ONE*, 3(3):e1831, March 2008. ISSN 1932-6203. . URL <http://journals.plos.org/plosone/article?id=10.1371/journal.pone.0001831>.  
524  
525 27. Jeffrey Ishizuka, Kristie Grebe, Eugene Shenderov, Bjoern Peters, Qiongyu Chen,  
526 YunChun Peng, Lili Wang, Tao Dong, Valerie Pasquetto, Carla Oseroff, John Sidney,  
527 Heather Hickman, Vincenzo Cerundolo, Alessandro Sette, Jack R. Bennink, Andrew  
528 McMichael, and Jonathan W. Yewdell. Quantitating T Cell Cross-Reactivity for Unre-  
529 lated Peptide Antigens. *The Journal of Immunology*, 183(7):4337–4345, October 2009.  
530 ISSN 0022-1767, 1550-6606. . URL <http://www.jimmunol.org/content/183/7/4337>.  
531  
532 28. Joseph N. Blattman, Rustom Antia, David J. D. Sourdive, Xiaochi Wang, Susan M.  
533 Kaech, Kaja Murali-Krishna, John D. Altman, and Rafi Ahmed. Estimating the Pre-  
534 cursor Frequency of Naive Antigen-specific CD8 T Cells. *Journal of Experimental*  
535 *Medicine*, 195(5):657–664, March 2002. ISSN 0022-1007, 1540-9538. . URL <http://jem.rupress.org/content/195/5/657>.  
536  
537 29. Cécile Alanio, Fabrice Lemaitre, Helen K. W. Law, Milena Hasan, and Matthew L. Albert.  
538 Enumeration of human antigen-specific naive CD8+ T cells reveals conserved precursor  
539 frequencies. *Blood*, 115(18):3718–3725, May 2010. ISSN 0006-4971, 1528-0020. . URL  
540 <http://www.bloodjournal.org/content/115/18/3718>.  
541  
542 30. François Legoux, Emilie Debeaupuis, Klara Echasserieau, Henri De La Salle, Xavier  
543 Saulquin, and Marc Bonneville. Impact of TCR Reactivity and HLA Phenotype on Naive  
544 CD8 T Cell Frequency in Humans. *The Journal of Immunology*, 184(12):6731–6738,  
545 June 2010. ISSN 0022-1767, 1550-6606. . URL <http://www.jimmunol.org/content/184/12/6731>.  
546  
547 31. Julia Schmidt, Christoph Neumann-Haefelin, Tayibe Altay, Emma Gostick, David A.  
548 Price, Volker Lohmann, Hubert E. Blum, and Robert Thimme. Immunodominance  
549 of HLA-A2-Restricted Hepatitis C Virus-Specific CD8+ T Cell Responses Is Linked to  
550 Naive-Precursor Frequency. *Journal of Virology*, 85(10):5232–5236, May 2011. ISSN  
551 0022-538X, 1098-5514. . URL <http://jvi.asm.org/content/85/10/5232>.  
552  
553 32. Ilka Hoof, Bjoern Peters, John Sidney, Lasse Eggens Pedersen, Alessandro Sette, Ole  
554 Lund, Søren Buus, and Morten Nielsen. NetMHCpan, a method for MHC class I binding  
555 prediction beyond humans. *Immunogenetics*, 61(1):1, January 2009. ISSN 0093-7711,  
546

- 547 1432-1211. . URL <https://link.springer.com/article/10.1007/s00251-008-0341-z>.
- 548 33. A. J. Yates. Theories and quantification of thymic selection. *Front Immunol*, 5:13, 2014.
- 549 .
- 550 34. Thomas Charles Butler, Mehran Kardar, and Arup K. Chakraborty. Quorum sensing
- 551 allows T cells to discriminate between self and nonself. *Proceedings of the National*
- 552 *Academy of Sciences*, 110(29):11833–11838, July 2013. ISSN 0027-8424, 1091-6490.
- 553 . URL <http://www.pnas.org/content/110/29/11833>.
- 554 35. G. Voisinne, B. G. Nixon, A. Melbinger, G. Gasteiger, M. Vergassola, and G. Altan-
- 555 Bonnet. T Cells Integrate Local and Global Cues to Discriminate between Structurally
- 556 Similar Antigens. *Cell Rep*, 11(8):1208–1219, May 2015.
- 557 36. Ludger Klein, Bruno Kyewski, Paul M. Allen, and Kristin A. Hogquist. Positive and
- 558 negative selection of the T cell repertoire: what thymocytes see (and don't see). *Nature*
- 559 *Reviews Immunology*, 14(6):nri3667, May 2014. ISSN 1474-1741. . URL
- 560 <https://www.nature.com/articles/nri3667>.
- 561 37. Takeshi Nitta, Shigeo Murata, Katsuhiko Sasaki, Hideki Fujii, Adiratna Mat Ripen,
- 562 Naozumi Ishimaru, Shigeo Koyasu, Keiji Tanaka, and Yousuke Takahama. Thymoprotea-
- 563 some Shapes Immunocompetent Repertoire of CD8+ T Cells. *Immunity*, 32(1):29–40,
- 564 January 2010. ISSN 1074-7613. . URL [http://www.sciencedirect.com/science/article/pii/](http://www.sciencedirect.com/science/article/pii/S1074761309005433)
- 565 [S1074761309005433](http://www.sciencedirect.com/science/article/pii/S1074761309005433).
- 566 38. Katsuhiko Sasaki, Kensuke Takada, Yuki Ohte, Hiroyuki Kondo, Hiroyuki Sorimachi,
- 567 Keiji Tanaka, Yousuke Takahama, and Shigeo Murata. Thymoproteasomes produce
- 568 unique peptide motifs for positive selection of CD8+ T cells. *Nature Communications*,
- 569 6:ncomms8484, June 2015. ISSN 2041-1723. . URL [https://www.nature.com/articles/](https://www.nature.com/articles/ncomms8484)
- 570 [ncomms8484](https://www.nature.com/articles/ncomms8484).
- 571 39. E Mark Gold. Language identification in the limit. *Information and Control*, 10(5):447–
- 572 474, May 1967. ISSN 0019-9958. . URL [http://www.sciencedirect.com/science/article/](http://www.sciencedirect.com/science/article/pii/S0019995867911655)
- 573 [pii/S0019995867911655](http://www.sciencedirect.com/science/article/pii/S0019995867911655).
- 574 40. J. L. McClelland, B. L. McNaughton, and R. C. O'Reilly. Why there are complementary
- 575 learning systems in the hippocampus and neocortex: insights from the successes and
- 576 failures of connectionist models of learning and memory. *Psychological Review*, 102(3):
- 577 419–457, July 1995. ISSN 0033-295X. .

# 1 **Supplementary Information for**

## 2 **Negative T cell selection on non-random peptides promotes robust self-nonsel** 3 **discrimination**

4 **Inge M. N. Wortel, Can Keşmir, Rob J. de Boer, Judith N. Mandl, Johannes Textor**

5 **Corresponding Author: Inge Wortel.**

6 **E-mail: [Inge.Wortel@radboudumc.nl](mailto:Inge.Wortel@radboudumc.nl)**

### 7 **This PDF file includes:**

8     Supplementary text

9     Figs. S1 to S6

10    Table S1

11    References for SI reference citations



## 12 Supporting Information Text

### 13 Supporting Methods

14 **Sequences.** We applied our TCR model to both 6-letter strings and 6-AA peptides. Throughout this methods section, we will  
15 refer to them as *strings* and *peptides* for methods specific to either languages or peptides, or as *sequences* for methods applying  
16 to both. With *self* sequences we mean either human peptides or English strings, and with *foreign* sequences we mean either  
17 pathogenic peptides or strings from other languages (see below).

18 **Strings** English training strings ("self") were extracted from Moby Dick (downloaded from [www.gutenberg.org/files/2489/2489.txt](http://www.gutenberg.org/files/2489/2489.txt)).  
19 Independent sets of test strings were extracted from translations of the Gospel of John in the Bible (downloaded from  
20 [www.biblegateway.com](http://www.biblegateway.com)). We obtained translations in different languages: English, Medieval English, Latin, and Plautdietsch  
21 (Indo-European languages), Tagalog and Hiligaynon (Austronesian languages), and Xhosa (Niger-Congo family of languages).  
22 Recognition of these test strings was always compared to recognition of unseen English control strings from the Moby Dick  
23 training set. Capital letters were removed and all spaces and punctuation marks were replaced by an underscore (`_`), yielding  
24 text with 27 possible characters (26 letters of the latin alphabet and `_`). Texts were then randomly cut into strings containing  
25 6 characters each. Please refer to our code repository (see *Data and code availability* in main text) to obtain the exact input  
26 text files and the scripts that generate the chunks.

27 **Peptides** Proteomes were obtained from Uniprot (1, 2) (Table S1). Potential HLA-A2:01 binders were predicted using  
28 NetMHCpan (3) (version 3.0), focusing on peptides of 9 AAs. Using the NetMHCpan default settings, the 2% highest scoring  
29 9-mers were defined as MHC-I binders. Of these, we selected the 6 residues at positions 3-8 to get the TCR-binding 6-mers,  
30 and then removed duplicates to get unique 6-mers for each proteome (Table S1).

31 **Repertoire model of negative selection.** A limiting factor for simulating negative selection on large TCR repertoires is compu-  
32 tational complexity. Our unbiased pre-selection repertoires contain TCRs for every possible binding motif of 6 letters (a-z or  
33 `_`) or 6 AAs – resulting in  $27^6 \approx 400$  million TCRs for the language AIS, and  $20^6 = 64$  million TCRs for the peptide AIS.  
34 Each of these TCRs needs to be compared against all sequences in the training set. Our implementation of the contiguous  
35 affinity model uses advanced computational methods as described in (4, 5) to compress T cell repertoires and to enable these  
36 comparisons between large sets of sequences. These methods are available in our code repository (see *Data and code availability*  
37 in main text).

38 **Training set selection.** Training sets of  $n$  English strings were sampled randomly in each simulation. Training sets of  $n$  self  
39 peptides were sampled from the total  $\sim 260,000$  human MHC-I binders in one of three ways: random, optimal, or biased  
40 sampling (see below for the last two).

41 **Optimal training peptide selection** "Optimal" training sets were designed to remove as many self-reactive TCRs as possible. We  
42 listed all self-reactive TCR binding motifs that would react to at least one of the  $\sim 260,000$  human MHC-I binders for a given  
43 threshold  $t$ , and then selected combinations of minimal numbers of self peptides that would delete a maximal number of these  
44 self-reactive TCR motifs. We could not find an exact solution to this combinatorial optimization problem, because there is  
45 a nearly infinite number of ways to select  $n$  out of  $\sim 260,000$  self peptides – and it is not possible to assess the removal of  
46 self-reactive TCRs for each of them. We therefore designed a "greedy" algorithm to find an approximative solution instead.  
47 Briefly, we iteratively select the self peptides that remove the most remaining self-reactive TCRs by repeating two steps:

- 48 1. List the self-reactive TCR motifs that still remain in the repertoire;
- 49 2. Select the self peptide that deletes the most of these remaining self-reactive TCRs. If multiple self peptides delete an  
50 equal number of remaining TCRs, we pick only those self peptides that do not overlap in the TCRs they delete.

51 We stop when all self-reactive TCRs are deleted. The result is an ordered list of self peptides, of which the top  $n$  epitopes  
52 form an "optimal" training set of size  $n$ . For  $t = 3$ , an optimally chosen 12,025 self peptides ( $\sim 5\%$  of all self peptides) could  
53 already remove all self-reactive TCRs, whereas this required 130,407 self peptides ( $\sim 50\%$  of all self peptides) at  $t = 4$ . For  
54 simulations with optimal training sets larger than this number, random self peptides were added to the optimal combinations  
55 to obtain the desired total number  $n$ .

56 **Biased training peptide selection** To generate training sets biased for rare AAs, all self peptides were first assigned a score that  
57 depended on their AA composition:

$$58 \quad F_{\text{pep}} = \sum_{p=1}^6 f_{\text{aa},p} \quad [1]$$

59 with  $f_{\text{aa},p}$  the frequency within all self peptides of the AA at position  $p$  of the 6-mer peptide. These scores were then  
60 transformed to a sampling probability  $P_{\text{pep}}$  as follows:

$$61 \quad P_{\text{pep}} = \frac{\max(F) - F_{\text{pep}}}{\max(F) - \min(F)} = \frac{6 \cdot f_{\text{aa},\max} - F_{\text{pep}}}{6 \cdot f_{\text{aa},\max} - 6 \cdot f_{\text{aa},\min}} \quad [2]$$

62 where  $f_{aa,max}$  is the frequency of the most common AA (L) in all self peptides, and  $f_{aa,min}$  the frequency of the most rare  
63 AA (W). Finally, we sample  $n$  training peptides from the total set of self peptides using probabilities  $(P_{pep})^s$ , where we use the  
64 parameter  $s$  to control the strength of the bias for rare AAs. Throughout the paper, we used either a weak bias ( $s = 1$ ) or a  
65 strong bias ( $s = 5$ ) as indicated in the figures.

## 66 Sequence analysis.

67 **String graphs** To visualize strings eliciting reactions from the same TCRs, we constructed a graph where each of 1,000 strings  
68 from both languages (English and Xhosa or English and more English) was a node. We then counted for each combination of  
69 strings how many TCR motifs (pre-selection) could react to both at  $t = 3$ , and connected their nodes with an edge if this  
70 number was at least 10,000.

71 For visualization, we ordered the connected components (clusters) in this graph by their number of nodes, and plotted every  
72 10th cluster in the final graph.

73 **Peptide graphs** To visualize self and foreign peptides to which the same TCRs react, we again started with a graph with nodes  
74 for all self- and foreign peptides, and counted for each pair the number of TCRs that could react to both. This time, we used  $t$   
75  $= 4$ , and connected peptides with an edge if at least 100 TCRs could react to both.

76 For visualization of HIV and self peptides, we then selected all connected components (clusters) that contained at least one  
77 HIV peptide.

78 **Concordance** Concordances were calculated using the full string- and peptide graphs described above (not just the subsets  
79 used for visualization). For each node, we listed the proportion of self- and foreign neighbors. If a node was isolated and had  
80 no neighbors, we used the expected value  $p_{0,class}$  of this proportion (which equals the proportion of self or foreign nodes in the  
81 entire graph). For both the self and foreign class of nodes, we then computed the concordance as the mean proportion  $p_{class}$  of  
82 same-class neighbors (so mean proportion of self neighbors for all self nodes, and mean proportion of foreign neighbors for all  
83 foreign nodes). Because the ratio between self and foreign peptides/strings was not always equal, we corrected for this ratio as  
84 follows:

$$85 \quad p_{corr,class} = \ln \frac{p_{class}}{1 - p_{class}} - \ln \frac{p_{0,class}}{1 - p_{0,class}} \quad [3]$$

$$86 \quad c_{class} = \frac{\exp(p_{corr,class})}{\exp(p_{corr,class}) + 1} \quad [4]$$

87 Here,  $p_{0,class}$  is the expected proportion of same-class neighbors as described above, and  $c_{class}$  is the ratio-corrected mean  
88 concordance for that class (self or foreign). This correction ensures that  $c_{class} = 0.5$  when  $p_{class} = p_{0,class}$ , 0 when there are  
89 only discordant edges between nodes of a different class, and 1 when there are only concordant edges between nodes of the  
90 same class. To avoid dividing by zero, we set an exception for situations where  $p_{class} = 1$ :

$$91 \quad \text{if } p_{class} = 1 \rightarrow c_{class} = 1 \quad [5]$$

92 The final, total concordance is then computed as a weighted average of the self- and foreign corrected mean concordance:

$$93 \quad c = p_{0,self} \cdot c_{self} + p_{0,foreign} \cdot c_{foreign} \quad [6]$$

94 **AA enrichment** The enrichment of AA  $a$  ( $E_a$ ) was computed as

$$95 \quad E_a = \ln \frac{f_{a,opt}}{f_{a,self}} \quad [7]$$

96 with  $f_{a,opt}$  the frequency of AA  $a$  within the optimal set of 130,407 self peptides for  $t = 4$  (see *Optimal training peptide*  
97 *selection*), and  $f_{a,self}$  its frequency within the total set of 263,216 self peptides (Table S1).

98 **Exchangeability** To compute exchangeability of self peptides, we constructed the graph of all self peptides. We then define  
99 exchangeability of a peptide as  $N + 1$ , where  $N$  is the number of neighbors in the peptide graph.

100 To compute how likely peptides of a given exchangeability are to delete foreign-reactive TCRs, we sorted self peptides on  
101 their exchangeability and then grouped them into 10 bins with equal numbers of peptides (deciles). Thus, the first decile  
102 contains the 10% of peptides with the lowest exchangeabilities, the highest decile the 10% with highest exchangeabilities, etc.  
103 We then constructed a graph containing all self and HIV peptides, and analyzed for each decile which percentage of the self  
104 peptides in it had an HIV neighbor in this graph (in other words, which percentage "resembled" an HIV peptide).

105 To analyze the relationship between exchangeability and AA composition, we computed both exchangeability and the AA  
106 composition score  $F_{pep}$  (see *Biased training peptide selection*) for 1000 randomly selected self peptides, and analyzed the  
107 association between the two scores.

## 108 Post-selection repertoire analysis.

109 **Sequence recognition** To assess sequence recognition by the post-selection repertoire, we counted the number of post-selection  
110 TCRs reacting to each sequence with an affinity of at least the predefined affinity threshold  $t$  (the same threshold as used for  
111 negative selection). Recognition was then reported in the number of reacting TCRs per million TCRs in the post-selection  
112 repertoire. If the post-selection repertoire was empty, we set this number to a value of 0. Reported recognition values are  
113 always from a single simulation.

114 **Self-foreign discrimination** To assess self-foreign discrimination within a test set containing equal numbers of self and foreign  
115 sequences across multiple simulations, the number of TCRs reacting to each sequence was counted as mentioned above. All  
116 sequences were then ranked from high to low numbers of reacting TCRs to obtain the percentage of foreign sequences among  
117 the 10% most frequently recognized sequences. When there were ties, we used the value of this percentage that would be  
118 expected after random tie-breaking.

119 **Affinity distribution** To compare TCR affinities between strings to which many TCRs react and strings with fewer reacting  
120 TCRs, strings were ranked by number of reacting TCRs as described above and split into the top 10% of most-frequently  
121 recognized strings and the remaining 90% of strings. For each string, we then counted the number of TCRs reacting to that  
122 string with a specific affinity. For both groups, we then computed how many TCRs recognized a string in that group at a given  
123 affinity, and report this as a percentage of all TCRs recognizing a string in that group.

124 **TCR survival/deletion** To assess TCR survival during negative selection on training sets of increasing size, we first chose a test  
125 set of self and/or foreign sequences, and listed all pre-selection TCRs whose affinity for these sequences was  $\geq t$ . We then  
126 negatively selected our repertoires on training sets that did not contain any of these test sequences, and assessed the percentage  
127 of the TCRs of interest that survived negative selection. TCR deletion can then be computed as 100 minus the TCR survival  
128 rate.

129 **Statistical analysis.** Central tendency and spread of asymmetrically distributed continuous variables (sequence recognition in  
130 TCRs/million) are described using median and interquartile range. For symmetrically distributed continuous variables (%  
131 foreign sequences among 10% most frequently recognized sequences, % TCR survival), we use mean and standard deviation  
132 (SD). Concordances/AA enrichment scores are computed as a single number for a complete set of sequences and therefore  
133 have no measure of spread. The Pearson's correlation coefficient and 95% confidence interval were computed using the `cor.test`  
134 function of the R stats package with default settings (R version 3.3.2, 2016-10-31, RRID:SCR\_001905).

135 We did not perform frequentist statistical testing, since we can generate as many simulation runs as needed to ensure that  
136 any interpreted differences are not simply due to random chance.

**Table S1. List of proteomes used to extract MHC-I binders. See also *Methods*.**

| Organism                           | Proteome details                                             | Proteins | ID          | Download date (d/m/y) | Unique 6-mers (#) |
|------------------------------------|--------------------------------------------------------------|----------|-------------|-----------------------|-------------------|
| Ebola virus                        | Mayinga, Zaire, 1976                                         | 9        | UP000007209 | 27/09/2017            | 140               |
| Human cyto-megalovirus (HCMV)      | Human herpesvirus 5<br>AD169 Isolate<br>Unknown X17403       | 190      | UP000008991 | 27/09/2017            | 2,090             |
| Hepatitis B virus                  | Genotype D subtype<br>ayw (isolate France/<br>Tiollais/1979) | 7        | UP000007930 | 27/09/2017            | 65                |
| Hepatitis C virus                  | H77 isolate Unknown<br>AF009606                              | 2        | UP000000518 | 27/09/2017            | 112               |
| Human immunodeficiency virus (HIV) | Type 1 group M subtype<br>B (isolate HXB2)                   | 9        | UP000002241 | 27/09/2017            | 69                |
| Vaccinia virus                     | Strain Copenhagen                                            | 257      | UP000008269 | 27/09/2017            | 1,955             |
| Zika virus                         | MR 766 Isolate<br>Unknown AY632535                           | 1        | UP000054557 | 27/09/2017            | 118               |
| Listeria monocytogenes             | serovar 1/2a<br>(strain ATCC<br>BAA-679 / EGD-e )            | 2,844    | UP000000817 | 27/09/2017            | 31,251            |
| Plasmodium ovale (Malaria)         | Wallikeri                                                    | 8,636    | UP000078550 | 27/09/2017            | 89,408            |
| Homo sapiens (human)               | -                                                            | 20,230   | UP000005640 | 01/06/2017            | 263,216           |

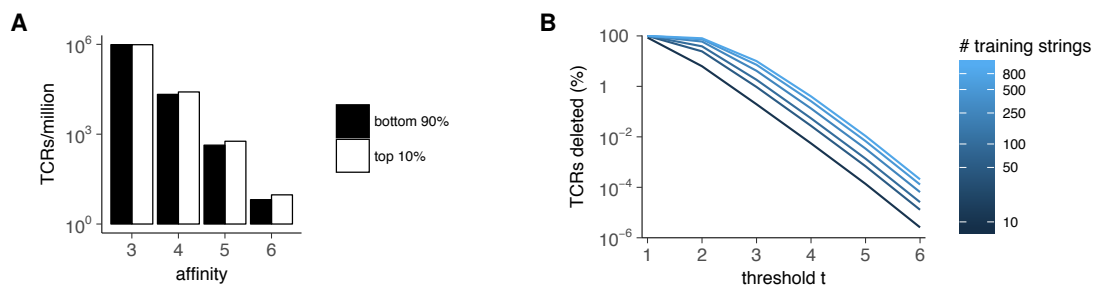

**Fig. S1.** An AIS of string recognition allows simulation of negative selection.

(a) Affinity distribution of surviving TCRs reacting to 50 English and 50 Xhosa strings after negative selection. Plot shows TCR counts (of specified affinity) per million total TCRs in either the top 10% of most frequently recognized strings, or the remaining bottom 90% of strings. (b) Average TCR deletion rate as a function of the affinity threshold  $t$  and the number of training strings used (colored lines). See also Fig. 2A, where we plot these data to show TCR survival as a function of the training set size at  $t = 3$ .

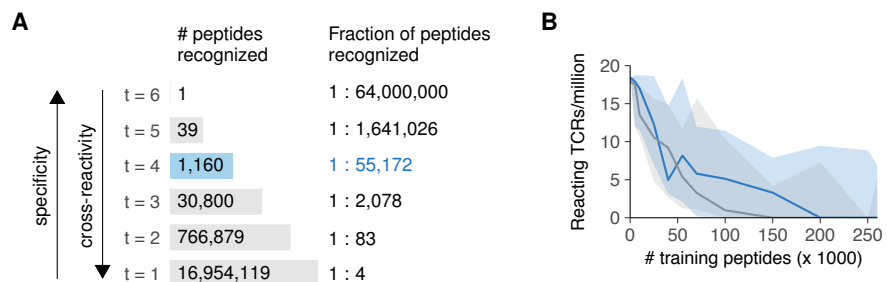

**Fig. S2.** A simple model of TCR-peptide recognition reproduces features of real TCR repertoires.

(a) Cross-reactivity at different affinity thresholds  $t$ . At  $t = 4$ , a TCR reacts to 1 in every 55,000 peptides, on average. (b) Reanalysis of the data shown in Fig. 3: Typical numbers of TCRs reacting to HIV (blue) and self (gray) peptides after negative selection with  $t = 4$ . Plot shows median and interquartile range of reacting TCRs/million. Typical values lie between 0 and 20 TCRs per million, depending on the number of training peptides used for negative selection.

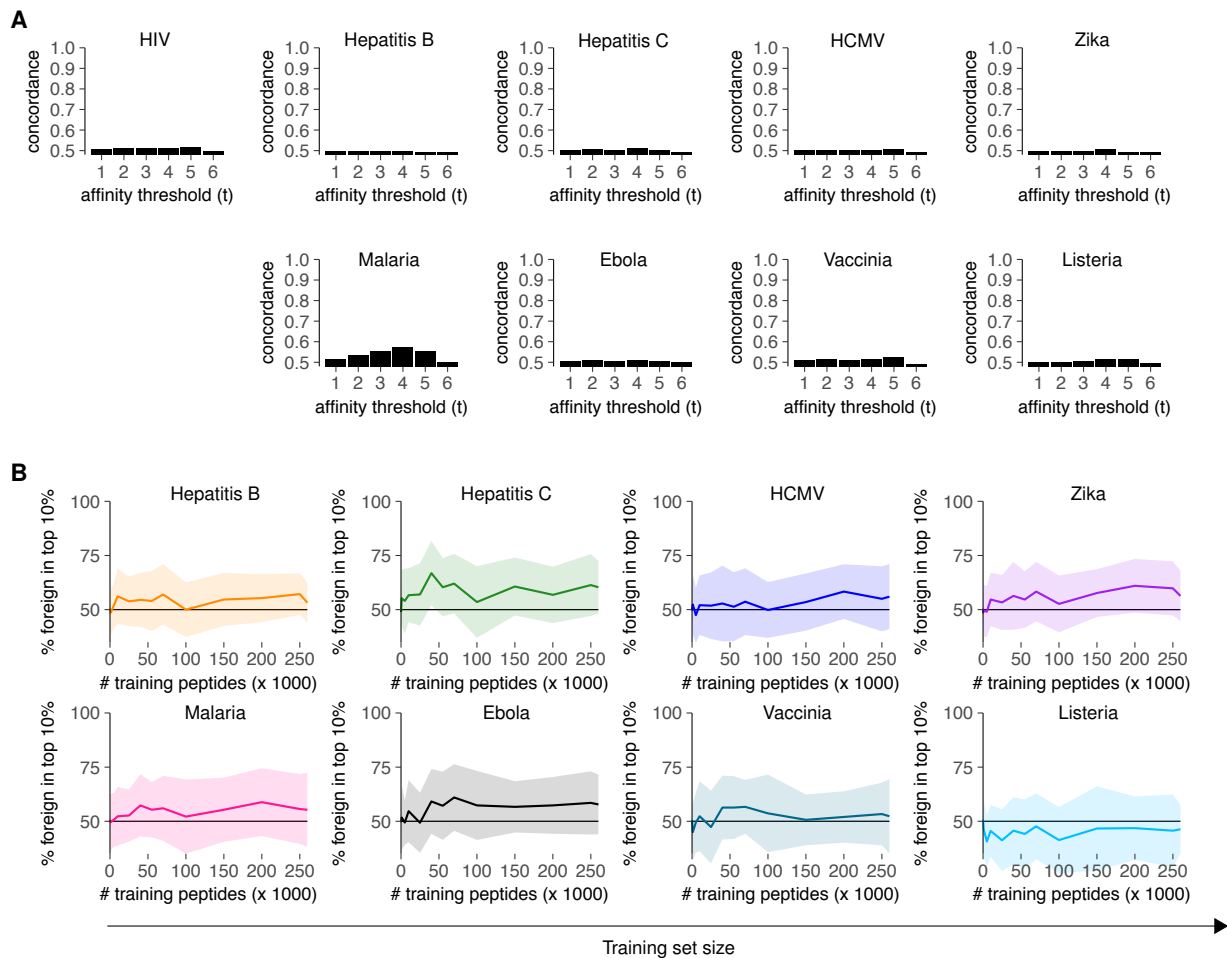

**Fig. S3.** Self-foreign discrimination is poor for all thresholds  $t$  and all pathogens tested.

(a) Concordance (% of same-class neighbors) in the graph of self and foreign peptides is low for all values of  $t$  and for all pathogens tested. (b) Self-foreign discrimination after negative selection at  $t = 4$  is low for all pathogens tested. Plot shows mean  $\pm$  SD of the percentage foreign peptides among most frequently recognized peptides (30 simulations).

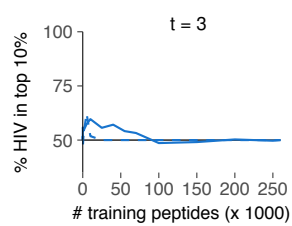

**Fig. S4.** Improved self representation fails to enhance self-foreign discrimination when cross-reactivity is too high. Plot shows mean of the percentage HIV peptides among most frequently recognized peptides after negative selection ( $t = 3$ , 30 simulations). Negative selection was performed on random (solid line, data from Fig. 3D included for comparison) or optimal (dashed line) training sets.



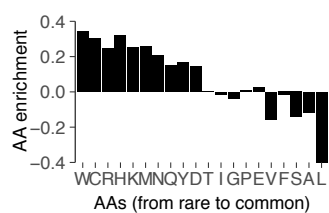

**Fig. S5.** Optimal training sets are enriched for rare AAs.

Plot shows AA enrichment in optimal training set. Enrichment is the log of the observed frequency divided by the frequency among all self peptides. Negative values indicate depletion.

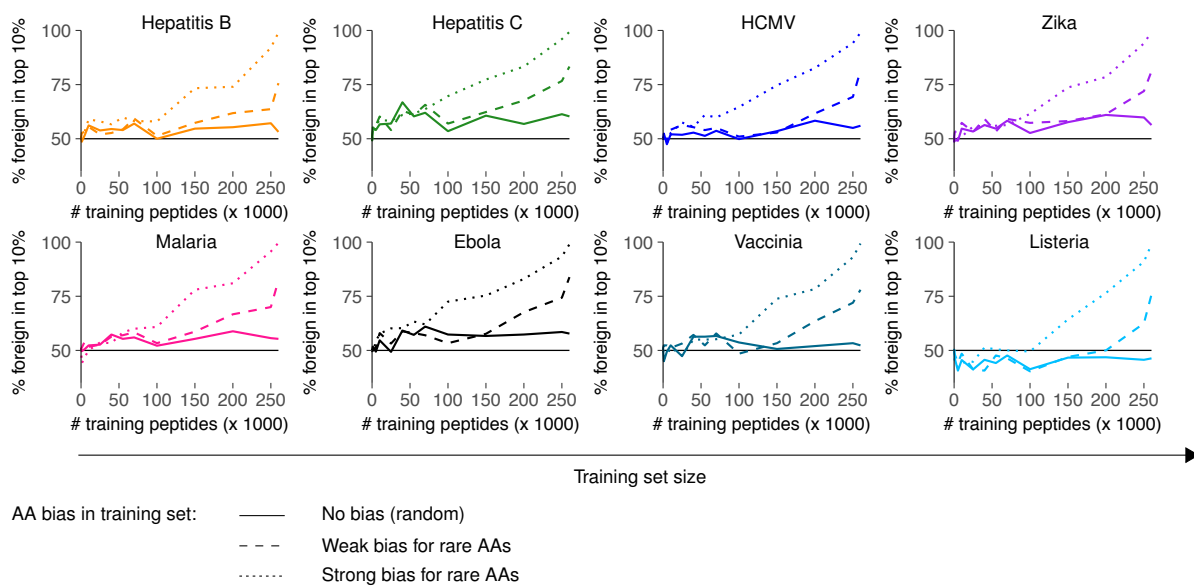

**Fig. S6.** Increased presentation of rare AAs during negative selection improves self-foreign discrimination for all pathogens tested.

Plot shows mean  $\pm$  SD of the percentage foreign peptides among most frequently recognized peptides after negative selection ( $t = 4$ , 30 simulations). Training peptides were either chosen randomly (solid line, data from Fig. S3B included for comparison) or with a weak/strong bias for peptides with rare AAs (dashed/dotted lines).

## 137 References

- 138 1. Eric Jain, Amos Bairoch, Severine Duvaud, Isabelle Phan, Nicole Redaschi, Baris E. Suzek, Maria J. Martin, Peter  
139 McGarvey, and Elisabeth Gasteiger. Infrastructure for the life sciences: design and implementation of the UniProt website.  
140 *BMC Bioinformatics*, 10:136, May 2009. ISSN 1471-2105. . URL <https://doi.org/10.1186/1471-2105-10-136>.
- 141 2. Ongoing and future developments at the Universal Protein Resource. *Nucleic Acids Research*, 39(suppl\_1):D214–D219,  
142 January 2011. ISSN 0305-1048. . URL [https://academic.oup.com/nar/article/39/suppl\\_1/D214/2505850](https://academic.oup.com/nar/article/39/suppl_1/D214/2505850).
- 143 3. Ilka Hoof, Bjoern Peters, John Sidney, Lasse Eggert Pedersen, Alessandro Sette, Ole Lund, Søren Buus, and Morten Nielsen.  
144 NetMHCpan, a method for MHC class I binding prediction beyond humans. *Immunogenetics*, 61(1):1, January 2009. ISSN  
145 0093-7711, 1432-1211. . URL <https://link.springer.com/article/10.1007/s00251-008-0341-z>.
- 146 4. Michael Elberfeld and Johannes Textor. Negative selection algorithms on strings with efficient training and linear-time  
147 classification. *Theoretical Computer Science*, 412(6):534–542, February 2011. ISSN 0304-3975. . URL <http://www.sciencedirect.com/science/article/pii/S0304397510005013>.
- 148 5. Johannes Textor, Katharina Dannenberg, and Maciej Liśkiewicz. A Generic Finite Automata Based Approach to Im-  
149 plementing Lymphocyte Repertoire Models. In *Proceedings of the 2014 Annual Conference on Genetic and Evolution-*  
150 *ary Computation*, GECCO '14, pages 129–136, New York, NY, USA, 2014. ACM. ISBN 978-1-4503-2662-9. . URL  
151 <http://doi.acm.org/10.1145/2576768.2598331>.  
152
